# Supplementary material
Source: PubMed Central journal article supplement (PMC4615394)
Supplement: NIHMS702915-supplement-Supplementary_Figure_1_1.pdf [file NIHMS702915-supplement-Supplementary_Figure_1_1.pdf]

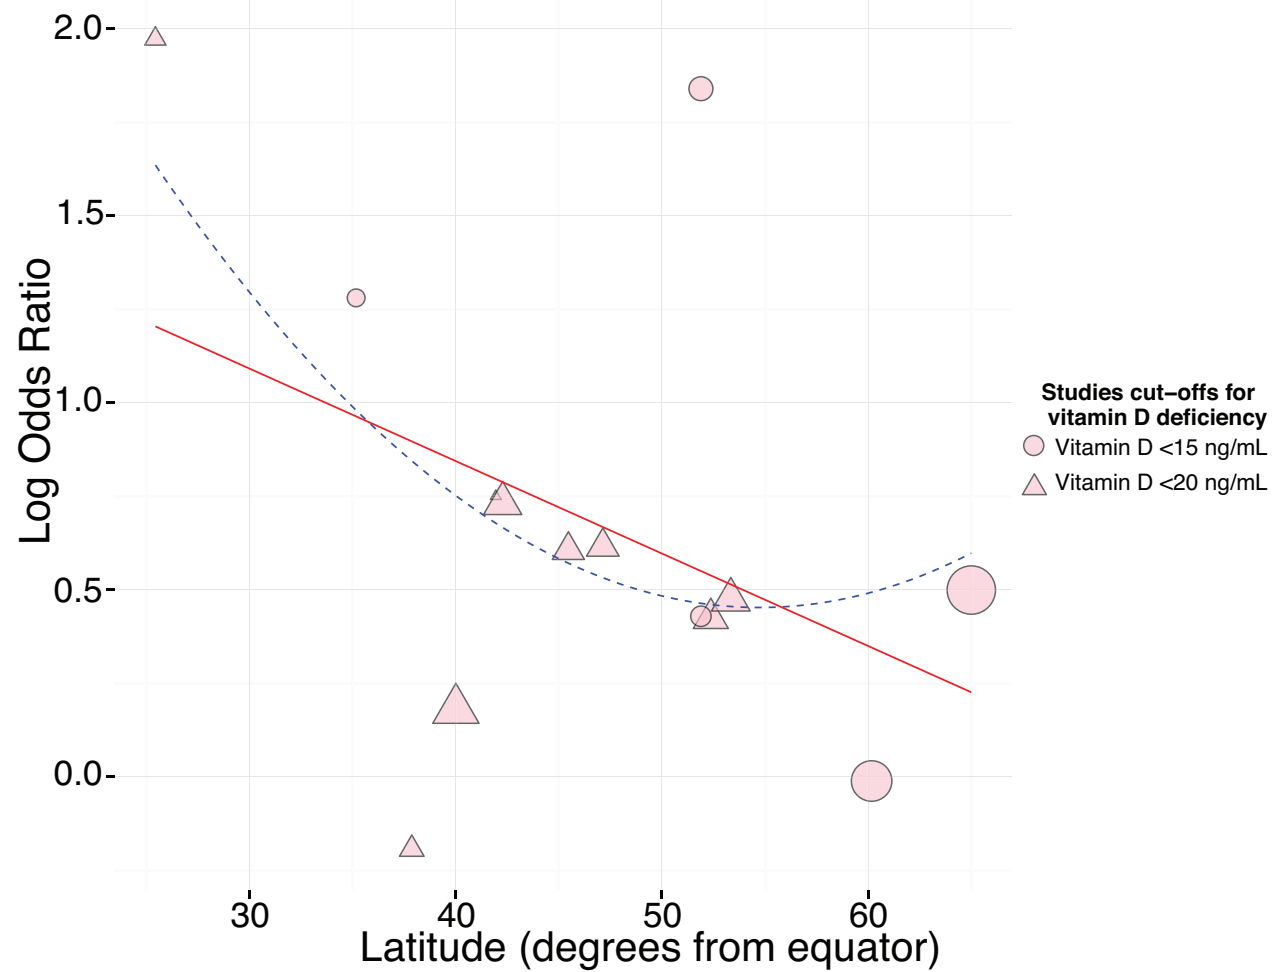

**Supplementary Figure 1:** Meta-regression analysis on the association between IBD and serum vitamin D levels using latitude as a moderator. Red solid line represents the linear model, whereas blue dashed line represents the polynomial fractional best fitting model. No interaction was found between serum vitamin D levels and latitude.
